# Supplementary material for: Association between Triplex-Forming Sites of Cardiac Long Noncoding RNA GATA6-AS1 and Chromatin Organization
Source: MDPI journal article supplement (doi:10.3390/ncrna8030041), 2022-06-01
Supplement: s1 [file s1]

# Association between Triplex-Forming Sites of Cardiac Long Noncoding RNA GATA6-AS1 and Chromatin Organization

## Supplementary Data

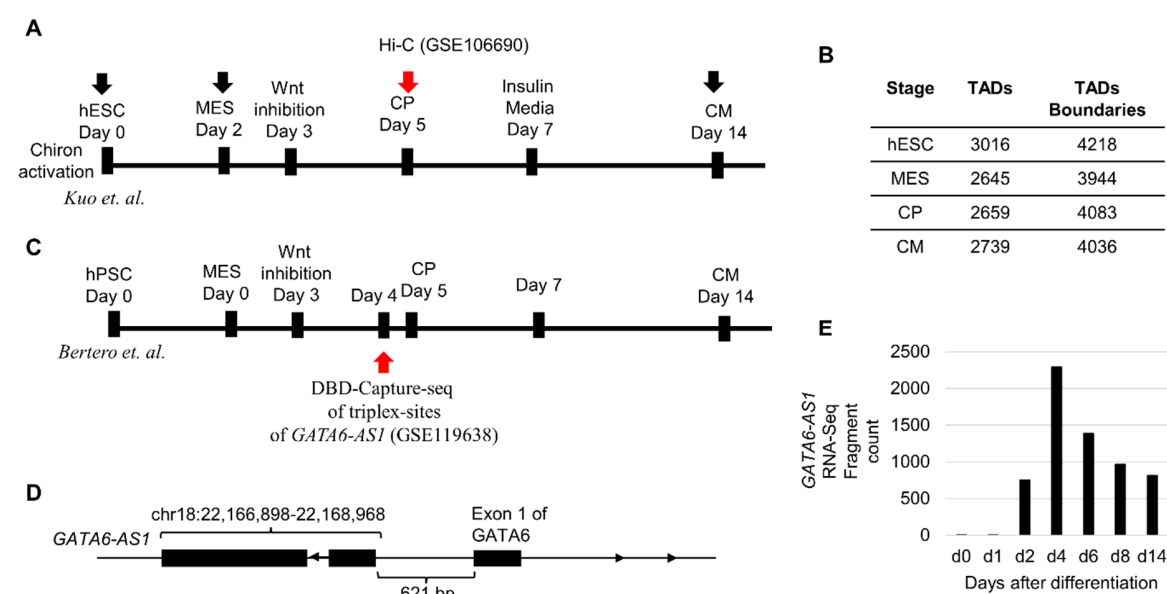

**Figure S1.** LncRNA *GATA6-AS1* in cardiac differentiation from previous studies. **(A)** Different Stages of cardiac differentiation with Hi-C data from the study by Kuo et. al. [19] **(B)** Number of TAD and TAD boundaries at different stages of cardiac differentiation from panel (A). **(C)** DBD-capture-seq data was performed to obtain triplex-forming sites of lncRNA *GATA6-AS1* at day 5 after differentiation in a study by Bertero et. al [18]. **(D)** Genomic location of *GATA6-AS1* relative to protein-coding gene *GATA6*. **(E)** Expression profile of *GATA6-AS1* at different stages of cardiac differentiation.

**Table S1:** LncRNAs with fold change > 2 at CP stage compared to day 0 of cardiac differentiation reported by Kuo et al. [19]. The lncRNAs are provided in order of their rank (highest rank first) assigned by Kuo et al. [19] based on the number of triplex-forming sites, size of triplex-forming domain in the lncRNAs sequences, and amount of elevated expression.

| <b>LncRNA</b>                                        | <b>Fold Change</b> | <b>Triplex-forming potential<br/>from Kuo et al. [19]</b> |
|------------------------------------------------------|--------------------|-----------------------------------------------------------|
| <i>GATA6-AS1</i>                                     | 6.22               | Yes                                                       |
| <i>JHDM1D-AS1 or KDM7A-DT</i>                        | 3.51               | Yes                                                       |
| <i>HOXB-AS1</i>                                      | 7.34               | Yes                                                       |
| <i>LINC00261</i>                                     | 4.87               | Yes                                                       |
| <i>KC6</i>                                           | 4.41               | Yes                                                       |
| <i>SEC24B-AS1</i>                                    | 2.72               | Yes                                                       |
| <i>ID2-AS1</i>                                       | 3.73               | Yes                                                       |
| <i>MALAT1</i>                                        | 3.06               | Yes                                                       |
| <i>HAND2-AS1</i>                                     | 7.32               | Yes                                                       |
| <i>LINC00890 or SERTM2<br/>(protein-coding gene)</i> | 4.43               | Yes                                                       |
| <i>ZNF436-AS1</i>                                    | 4.35               | Yes                                                       |
| <i>MEF2C-AS1</i>                                     | 4.05               | Yes                                                       |
| <i>LINC00894 or EOLA2-DT</i>                         | 3.64               | Yes                                                       |
| <i>BAALC-AS1</i>                                     | 2.17               | Yes                                                       |
| <i>N4BP2L2-IT2</i>                                   | 2.2                | Yes                                                       |
| <i>TMCC1-AS1</i>                                     | 3.33               | No                                                        |
| <i>DICER1-AS1</i>                                    | 2.37               | No                                                        |
| <i>MANEA-AS1</i>                                     | 2.57               | No                                                        |
| <i>LINC01473</i>                                     | 3.37               | No                                                        |
| <i>ACVR2B-AS1</i>                                    | 2.35               | No                                                        |
| <i>LINC01125</i>                                     | 2.28               | No                                                        |
| <i>GATA3-AS1</i>                                     | 5.56               | No                                                        |
| <i>LINC01099</i>                                     | 6.91               | No                                                        |
| <i>TBX2-AS1</i>                                      | 7.46               | No                                                        |
| <i>LINC01440</i>                                     | 6.02               | No                                                        |
| <i>LINC00648</i>                                     | 4.05               | No                                                        |
| <i>ALOX12-AS1</i>                                    | 2.41               | No                                                        |
| <i>TAPT1-AS1</i>                                     | 2.69               | No                                                        |
| <i>CAHM</i>                                          | 2.04               | No                                                        |
| <i>MIR210HG</i>                                      | 2.37               | No                                                        |
| <i>VIM-AS1</i>                                       | 2.29               | No                                                        |
| <i>PTOV1-AS1</i>                                     | 2.23               | No                                                        |
| <i>MFI2-AS1</i>                                      | 2.28               | No                                                        |

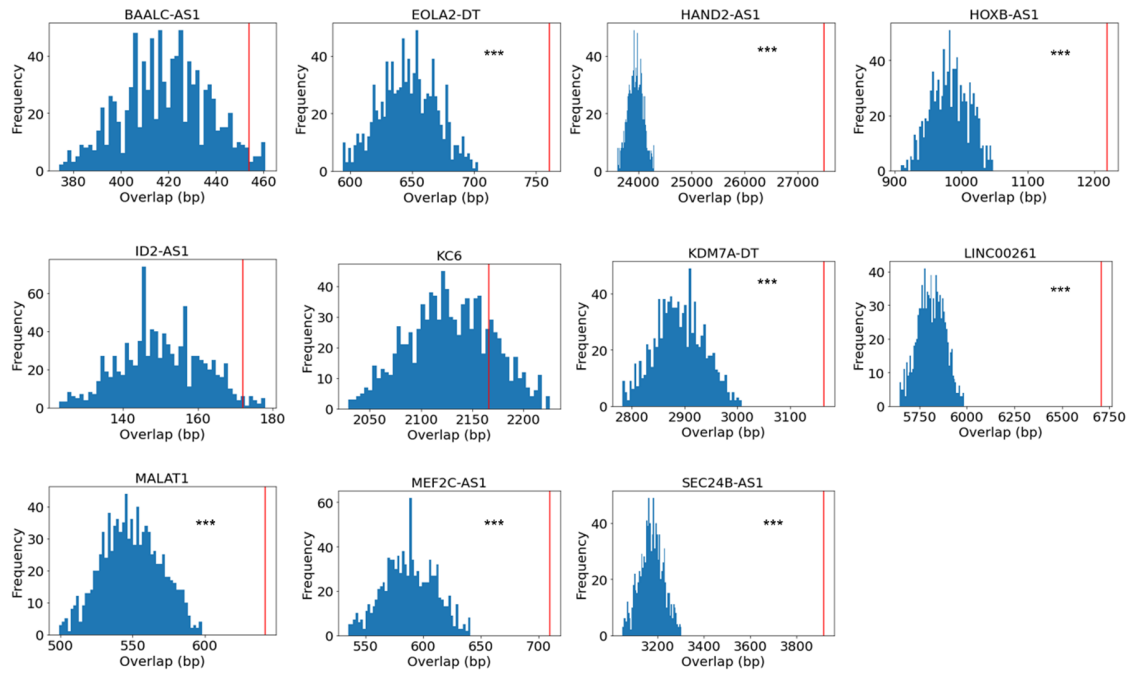

**Figure S2.** Enrichment of 9 cardiac lncRNAs' triplex sites in TAD boundaries at CP stage. The distribution of expected coverage (blue) compared to the observed coverage (vertical red line) in TAD boundaries are shown. The x-axis and y-axis represent coverage, and frequency, respectively. A statistical difference between expected coverage and random measurements is indicated by \*\*\* ( $p$ -value < 0.001).

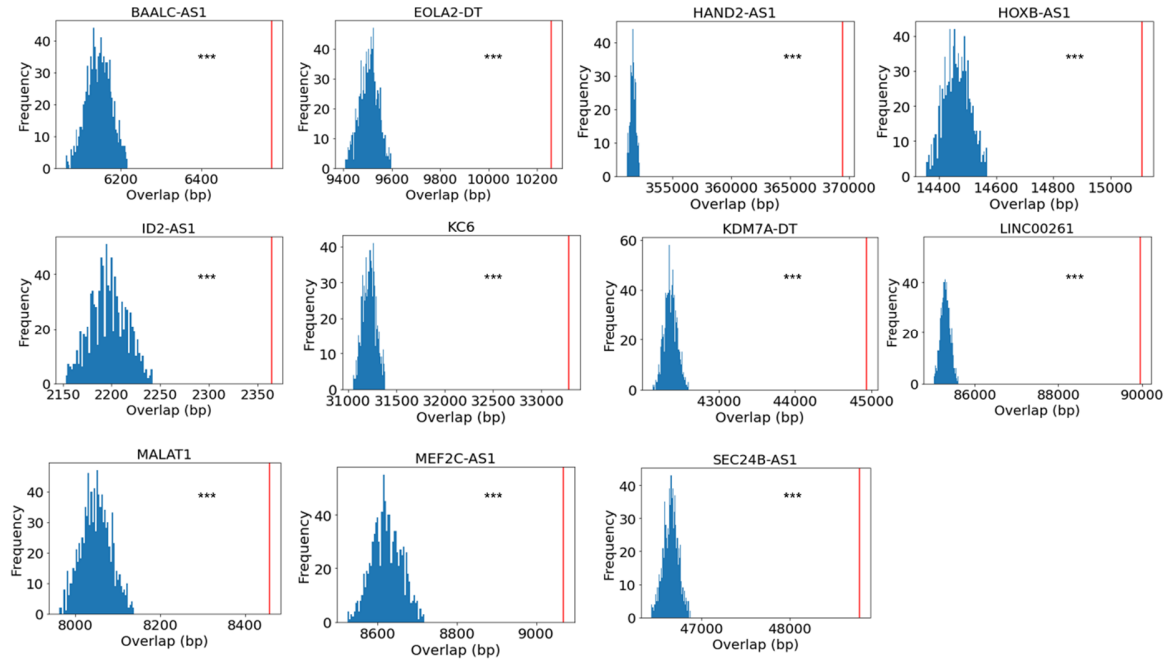

**Figure S3.** Enrichment of 9 cardiac lncRNAs' triplex sites in TADs at CP stage. The distribution of expected coverage (blue) compared to the observed coverage (vertical red line) in TAD domains are shown. The x-axis and y-axis represent coverage, and frequency, respectively. A statistical difference between expected coverage and random measurements is indicated by \*\*\* ( $p$ -value < 0.001).

## References

- 18 Bertero, A.; Fields, P.A.; Ramani, V.; Bonora, G.; Yardimci, G.G.; Reinecke, H.; Pabon, L.; Noble, W.S.; Shendure, J.; Murry, C.E. Dynamics of genome reorganization during human cardiogenesis reveal an RBM20-dependent splicing factory. *Nat. Commun.* **2019**, *10*, 1538. <https://doi.org/10.1038/s41467-019-09483-5>.
- 19 Kuo, C.C.; Hänzelmann, S.; Sentürk Cetin, N.; Frank, S.; Zajzon, B.; Derks, J.P.; Akhade, V.S.; Ahuja, G.; Kanduri, C.; Grummt, I.; et al. Detection of RNA-DNA binding sites in long noncoding RNAs. *Nucleic Acids Res.* **2019**, *47*, e32. <https://doi.org/10.1093/nar/gkz037>.
